# Supplementary material
Source: PubMed Central journal article supplement (PMC3457000)
Supplement: NIHMS401716-supplement-01.pdf [file NIHMS401716-supplement-01.pdf]

## **Supplemental Information for:**

The collection of NFATc1-dependent transcripts in the osteoclast includes numerous genes non-essential to physiologic bone resorption

Julia F. Charles<sup>a</sup>, Fabienne Coury<sup>b,c,1,2</sup>, Rosalyn Sulyanto<sup>b,1,3</sup>, Despina Sitara<sup>b,4</sup>, Jing Wu<sup>b,5</sup>, Nicholas Brady<sup>b,6</sup>, Kelly Tsang<sup>b</sup>, Kirsten Sigrist<sup>b,7</sup>, Douglas M. Tollefsen<sup>d</sup>, Li He<sup>d</sup>, Daniel Storm<sup>e</sup>, Antonios O. Aliprantis<sup>a,b</sup>

## Supplemental Figure Legends

**Supplemental Fig. 1 – Supplemental analysis of *Nhedc2*<sup>GT/GT</sup> mice. (A)** Genotyping PCR reactions for the *Nhedc2*<sup>WT</sup> (left gel) and *Nhedc2*<sup>GT</sup> (right gel) alleles on tail DNA from *Nhedc2*<sup>+/+</sup> (lane 2), *Nhedc2*<sup>GT/+</sup> (lane 3) and *Nhedc2*<sup>GT/GT</sup> (lane 4) mice. A 100 bp DNA ladder is shown in lane 1. **(B)** Micro-CT quantification of femoral metaphyseal trabecular parameters in 12-14 week old female and male *Nhedc2*<sup>+/+</sup> (n=9, female; n=11, male) and *Nhedc2*<sup>GT/GT</sup> (n=9, female; n=11, male) mice. (n.s., not significant).

**Supplemental Fig. 2 – Supplemental analysis of *Serpind1*<sup>-/-</sup> mice. (A)** Micro-CT quantification of femoral metaphyseal trabecular parameters in 12-week-old female and male *Serpind1*<sup>+/+</sup> (female, n=7; male, n=6) and *Serpind1*<sup>-/-</sup> (female, n=4; male, n=3). **(B)** Real time PCR analysis for osteoclast marker genes in samples from *Serpind1*<sup>+/+</sup> (n=2) and *Serpind1*<sup>-/-</sup> (n=4) OCPs stimulated with MCSF and RANKL to induce osteoclast differentiation. **(C, D)** Real time PCR analysis using primers targeting *Serpind1* exons 2 (forward) and 3 (reverse) on **(C)** *Serpind1*<sup>+/+</sup> and *Serpind1*<sup>-/-</sup> liver or **(D)** WT BMMs cultured with MCSF alone or MCSF and RANKL to induce osteoclast differentiation. **(E)** Real time PCR analysis for *Serpin* homologs in samples from *Serpind1*<sup>+/+</sup> (n=2) and *Serpind1*<sup>-/-</sup> (n=4) OCPs stimulated with MCSF and RANKL to induce osteoclast differentiation. (n.s., not significant; N.D., not detectable).

**Supplemental Fig. 3 – Supplemental analysis of *Adcy3*<sup>-/-</sup> mice. (A)** Micro-CT quantification of femoral metaphyseal trabecular parameters in 8-week-old female and male *Adcy3*<sup>+/+</sup> (female, n=6; male, n=5) and *Adcy3*<sup>-/-</sup> (female, n=7; male, n=8) mice. **(B)** Body weight of 8-week old female and male *Adcy3*<sup>+/+</sup> and *Adcy3*<sup>-/-</sup> mice used for micro-CT analysis in Fig. 4 A,B and Supplemental Fig. 3A. **(C)** Real time PCR analysis for osteoclast marker genes expression in *Adcy3*<sup>+/+</sup> (n=3) and *Adcy3*<sup>-/-</sup> (n=4) OCPs stimulated with MCSF and RANKL to induce osteoclast differentiation. Data in (C) is normalized to WT littermates. **(D)** Real time PCR analysis for *Adcy3* expression in *Adcy3*<sup>+/+</sup> (n=2) and *Adcy3*<sup>-/-</sup> (n=3) OCPs stimulated with MCSF and RANKL to induce osteoclast differentiation. (n.s., not significant).

**Supplemental Fig. 4 – Supplemental analysis of *Rhoc*<sup>-/-</sup> mice. (A)** Micro-CT quantification of femoral metaphyseal trabecular parameters in 8-10 week old female

and male *Rhoc*<sup>2/+</sup> (female, n=7; male, n=2) and *Rhoc*<sup>-/-</sup> (female, n=5; male, n=2). **(B)** Real time PCR analysis for *Rhoc* expression in *Rhoc*<sup>2/+</sup> (n=2) and *Rhoc*<sup>-/-</sup> (n=2) OCPs stimulated with MCSF and RANKL to induce osteoclast differentiation.

**Supplemental Fig. 5 – Supplemental analysis of *Rab38*<sup>cht/cht</sup> mice.** **(A)** Micro-CT quantification of femoral metaphyseal trabecular parameters in 8-week-old female and male *Rab38*<sup>+/+</sup> (female, n=2; male, n=4) and *Rab38*<sup>cht/cht</sup> (female, n=3; male, n=3) mice. **(B)** Real time PCR analysis for osteoclast marker genes expression in *Rab38*<sup>+/+</sup> (n=2) and *Rab38*<sup>cht/cht</sup> (n=1) OCPs stimulated with MCSF alone or MCSF and RANKL to induce osteoclast differentiation. (n.s., not significant; \*, p<0.05)

**Supplemental Table 1 – Quantitative Real-time PCR primers used in this study**

| Primer Set                          | Forward Primers (5'-3') | Reverse Primers (5'-3') | Source |
|-------------------------------------|-------------------------|-------------------------|--------|
| <i>Adcy3</i>                        | CCTGAGTCCTTGGAGAACCT    | CCACGTAGCAGTCAAAGAGG    | A      |
| <i>Hmbs</i>                         | ATGAGGGTGATTTCGAGTGGG   | CAAACGTATGCCAGGGTACAA   | B      |
| <i>Hprt</i>                         | GTTAAGCAGTACAGCCCCAAA   | AGGGCATATCCAACAACAACTT  | C      |
| <i>Nfatc1</i>                       | TGCCTTTTGCAGCAGTATCT    | CAGGCAAGGATGGGCTCATAT   | D      |
| <i>Nhedc1</i>                       | CCACTGGGCAGATGGTATTT    | GCAGCATGCCAAGAAGA       | E      |
| <i>Nhedc2</i>                       | TTGTTCCATCACCGGAGGTAA   | TTGGTGTTGAGTGCTTGCC     | E      |
| <i>Rhoc</i>                         | ACTCCATGCTGCCAGTTTCT    | AGGCCAGAGGGACTAAGAGC    | E      |
| <i>Rab38</i>                        | CCAAGGGAAGGATGTGCTTA    | GTGAGATGGGGCTTCACAAT    | E      |
| <i>Serpind1</i><br>( <i>ex2-3</i> ) | GGCAAACAACCACATTCTG     | TCTCTCATTAGCCGGAAGT     | E      |
| <i>Serpind1</i><br>( <i>ex3-4</i> ) | GAGTACGTAGGGGGCATCAG    | GGACCTCCACCAGGTTGTAA    | E      |
| <i>Serpinb1a</i>                    | ACATCCATTACGCTTCCAAA    | GGCCAAGTCAGCACCATACAT   | C      |
| <i>Serpinb2</i>                     | GTGCTGGGGGTAACACTGAAC   | GCGAAATCACAGCCACTGAAG   | C      |
| <i>Serpine2</i>                     | CACATGGGATCGCGTCCATC    | CAGCACTTTACCAACTCCGTTTA | C      |
| <i>Serpinh1</i>                     | GCCGAGGTGAAGAAACCCC     | CATCGCCTGATATAGGCTGAAG  | C      |

A – Designed with the on-line GenScript Real Time PCR (TaqMan) Primer Design program.

B – Gift of Dr. Kevin McHugh, College of Dentistry, University of Florida

C - The Center for Comparative and Integrative Biology Primer Bank, Harvard Medical School. Primerbank ID: *Hprt* (7305155a2), *Serpinb1a* (13384828a1), *Serpinb2* (6755098a1), *Serpine2* (6678099a1), *Serpinh1* (6753304a1).

D - A.O. Aliprantis, Y. Ueki, R. Sulyanto, A. Park, K.S. Sigrist, S.M. Sharma, M.C. Ostrowski, B.R. Olsen, L.H. Glimcher, NFATc1 in mice represses osteoprotegerin during osteoclastogenesis and dissociates systemic osteopenia from inflammation in cherubism, *J Clin Invest.* 118 (2008) 3775-89.

E - Designed with the on-line Primer 3 tool. Steve Rozen and Helen J. Skaletsky (2000) Primer3 on the WWW for general users and for biologist programmers. In: Krawetz S, Misener S (eds) Bioinformatics Methods and Protocols: Methods in Molecular Biology. Humana Press, Totowa, NJ, pp 365-386.

**Supplemental Table 2 – Raw microarray data for the genes depicted on the heat map in Fig. 1A.**

| <b>Heatmap.order</b> | <b>Probeset</b> | <b>Gene Symbol</b> | <b>p-value</b> | <b>FDR</b> | <b>log2(FC) KOvWT</b> |
|----------------------|-----------------|--------------------|----------------|------------|-----------------------|
| 98                   | 1417700_at      | Rab38              | 0.005108       | 0.063074   | -3.71                 |
| 97                   | 1420575_at      | Mt3                | 0.004283       | 0.060491   | -4.51                 |
| 96                   | 1437308_s_at    | F2r                | 0.003823       | 0.059292   | -4.82                 |
| 95                   | 1451710_at      | Oscar              | 0.002111       | 0.052424   | -4.88                 |
| 94                   | 1433474_at      | Edil3              | 0.004097       | 0.060422   | -4.28                 |
| 93                   | 1448605_at      | Rhoc               | 0.022969       | 0.110736   | -2.87                 |
| 92                   | 1426951_at      | Crim1              | 0.020935       | 0.106308   | -3.20                 |
| 91                   | 1460197_a_at    | Steap4             | 0.015549       | 0.093885   | -6.51                 |
| 90                   | 1420461_at      | Mst1r              | 0.011264       | 0.082114   | -4.90                 |
| 89                   | 1431711_a_at    | Kazn               | 0.013887       | 0.089020   | -3.22                 |
| 88                   | 1421959_s_at    | Adcy3              | 0.009205       | 0.076730   | -2.66                 |
| 87                   | 1425829_a_at    | Steap4             | 0.009882       | 0.078992   | -3.83                 |
| 86                   | 1452646_at      | Trp53inp2          | 0.011529       | 0.082658   | -4.30                 |
| 85                   | 1426869_at      | Boc                | 0.007521       | 0.071389   | -2.92                 |
| 84                   | 1450625_at      | Col5a2             | 0.016968       | 0.097514   | -2.83                 |
| 83                   | 1422809_at      | Rims2              | 0.015804       | 0.094740   | -3.29                 |
| 82                   | 1437226_x_at    | Marcksl1           | 0.000028       | 0.044454   | -2.82                 |
| 81                   | 1422619_at      | Ppap2a             | 0.000004       | 0.044454   | -4.07                 |
| 80                   | 1424133_at      | Tmem98             | 0.000042       | 0.044454   | -5.57                 |
| 79                   | 1418569_at      | Fblim1             | 0.000068       | 0.044454   | -3.46                 |
| 78                   | 1417089_a_at    | Ckmt1              | 0.000133       | 0.044454   | -2.98                 |
| 77                   | 1450429_at      | Capn6              | 0.000069       | 0.044454   | -2.70                 |
| 76                   | 1450843_a_at    | Serpinh1           | 0.000033       | 0.044454   | -4.39                 |

|    |              |          |          |          |       |
|----|--------------|----------|----------|----------|-------|
| 75 | 1434588_x_at | Tbca     | 0.001101 | 0.046468 | -2.68 |
| 74 | 1421791_at   |          | 0.000757 | 0.044454 | -3.07 |
| 73 | 1425702_a_at | Enpp5    | 0.000312 | 0.044454 | -2.90 |
| 72 | 1425339_at   | Plcb4    | 0.000146 | 0.044454 | -4.77 |
| 71 | 1455235_x_at | Ldhb     | 0.000055 | 0.044454 | -3.62 |
| 70 | 1425622_at   | Edil3    | 0.000145 | 0.044454 | -4.18 |
| 69 | 1421511_at   | Itgb3    | 0.000092 | 0.044454 | -6.33 |
| 68 | 1448237_x_at | Ldhb     | 0.000107 | 0.044454 | -3.06 |
| 67 | 1422620_s_at | Ppap2a   | 0.000103 | 0.044454 | -4.05 |
| 66 | 1416666_at   | Serpine2 | 0.000070 | 0.044454 | -5.04 |
| 65 | 1422967_a_at | Tfrc     | 0.000281 | 0.044454 | -2.79 |
| 64 | 1452257_at   | Bdh1     | 0.000490 | 0.044454 | -2.71 |
| 63 | 1448942_at   | Gng11    | 0.000355 | 0.044454 | -2.83 |
| 62 | 1419136_at   | Akr1c18  | 0.000436 | 0.044454 | -4.28 |
| 61 | 1417730_at   | Ext1     | 0.000294 | 0.044454 | -3.06 |
| 60 | 1422515_at   | Pate4    | 0.000105 | 0.044454 | -3.43 |
| 59 | 1415874_at   | Spry1    | 0.000112 | 0.044454 | -2.74 |
| 58 | 1430233_a_at | Nhedc1   | 0.000064 | 0.044454 | -2.86 |
| 57 | 1451596_a_at | Sphk1    | 0.000103 | 0.044454 | -2.90 |
| 56 | 1439995_at   | Nhedc2   | 0.002112 | 0.052424 | -4.95 |
| 55 | 1435463_s_at | Myo1d    | 0.002468 | 0.053783 | -4.18 |
| 54 | 1423892_at   | Apbb1    | 0.001599 | 0.049710 | -3.05 |
| 53 | 1425442_at   | Oscar    | 0.001743 | 0.050429 | -4.25 |
| 52 | 1418680_at   | Serpind1 | 0.001835 | 0.051020 | -3.35 |
| 51 | 1454114_a_at | Nhedc1   | 0.001183 | 0.046674 | -4.84 |
| 50 | 1449141_at   | Fblim1   | 0.001226 | 0.047183 | -2.89 |

|    |              |          |          |          |       |
|----|--------------|----------|----------|----------|-------|
| 49 | 1450852_s_at | F2r      | 0.000737 | 0.044454 | -4.72 |
| 48 | 1451601_a_at | Spns2    | 0.000813 | 0.045119 | -3.20 |
| 47 | 1427891_at   | Gimap6   | 0.000683 | 0.044454 | -5.31 |
| 46 | 1448502_at   | Slc16a7  | 0.001020 | 0.046468 | -3.79 |
| 45 | 1434499_a_at | Ldhb     | 0.000500 | 0.044454 | -4.13 |
| 44 | 1418688_at   | Calcr    | 0.000394 | 0.044454 | -4.80 |
| 43 | 1426959_at   | Bdh1     | 0.000220 | 0.044454 | -3.55 |
| 42 | 1421425_a_at | Rcan2    | 0.000292 | 0.044454 | -3.13 |
| 41 | 1425250_a_at | Slc14a2  | 0.000940 | 0.046404 | -2.94 |
| 40 | 1449945_at   | Ppargc1b | 0.001283 | 0.047286 | -2.64 |
| 39 | 1423893_x_at | Apbb1    | 0.000328 | 0.044454 | -2.62 |
| 38 | 1416601_a_at | Rcan1    | 0.000481 | 0.044454 | -2.63 |
| 37 | 1425842_at   | Edil3    | 0.000503 | 0.044454 | -3.72 |
| 36 | 1422090_a_at | Pfkfb2   | 0.000861 | 0.045901 | -4.12 |
| 35 | 1452492_a_at | Slc37a2  | 0.001084 | 0.046468 | -2.61 |
| 34 | 1419082_at   | Serpib2  | 0.037980 | 0.143389 | -2.59 |
| 33 | 1436929_x_at | Adcy3    | 0.031294 | 0.129404 | -3.09 |
| 32 | 1449943_at   | Lfng     | 0.023573 | 0.112131 | -2.72 |
| 31 | 1428895_at   | Rftn2    | 0.005551 | 0.065208 | -4.22 |
| 30 | 1450932_s_at | Dock9    | 0.007990 | 0.073392 | -3.91 |
| 29 | 1452405_x_at | Gm10889  | 0.004160 | 0.060422 | -3.33 |
| 28 | 1426168_a_at |          | 0.003382 | 0.057404 | -3.54 |
| 27 | 1423952_a_at | Krt7     | 0.002774 | 0.054990 | -3.65 |
| 26 | 1422875_at   | Cd84     | 0.000035 | 0.044454 | -2.91 |
| 25 | 1434624_x_at | Rps9     | 0.000177 | 0.044454 | -2.85 |
| 24 | 1416007_at   | Satb1    | 0.000082 | 0.044454 | -2.94 |



|    |                    |           |          |          |       |
|----|--------------------|-----------|----------|----------|-------|
| 23 | 1428372_at         | St5       | 0.001109 | 0.046468 | -4.79 |
| 22 | 1419621_at         | Ankrd2    | 0.000473 | 0.044454 | -4.66 |
| 21 | 1425444_a_at       | Tgfbr2    | 0.000379 | 0.044454 | -4.60 |
| 20 | 1425934_a_at       | B4galt4   | 0.000027 | 0.044454 | 2.79  |
| 19 | 1448301_s_at       | Serpinb1a | 0.000049 | 0.044454 | 3.10  |
| 18 | 1453223_s_at       | Dppa2     | 0.000044 | 0.044454 | 3.87  |
| 17 | 1416444_at         | Elovl2    | 0.000086 | 0.044454 | 3.65  |
| 16 | 1416318_at         | Serpinb1a | 0.000336 | 0.044454 | 3.03  |
| 15 | 1427760_s_at       |           | 0.000177 | 0.044454 | 4.90  |
| 14 | 1437693_at         | D1Pas1    | 0.000583 | 0.044454 | 4.02  |
| 13 | 1434334_at         | Prkd2     | 0.000568 | 0.044454 | 3.79  |
| 12 | 1449033_at         | Tnfrsf11b | 0.000033 | 0.044454 | 5.44  |
| 11 | 1427231_at         | Robo1     | 0.001623 | 0.050016 | 3.15  |
| 10 | 1422368_at         | Vmn1r43   | 0.001813 | 0.051020 | 3.47  |
| 9  | 1437275_at         | Ctnna1    | 0.000322 | 0.044454 | 4.40  |
| 8  | 1452426_x_at       |           | 0.015491 | 0.093772 | 4.93  |
| 7  | 1439243_x_at       | Cops5     | 0.016630 | 0.096553 | 4.22  |
| 6  | 1450922_a_at       | Tgfb2     | 0.009969 | 0.079513 | 3.45  |
| 5  | 1415780_a_at       | Armcx2    | 0.020081 | 0.103541 | 3.34  |
| 4  | AFFX-DapX-<br>5_at |           | 0.009520 | 0.078134 | 2.70  |
| 3  | 1449782_at         | AA517650  | 0.010090 | 0.079789 | 2.79  |
| 2  | 1419521_at         | Zfp94     | 0.038739 | 0.144595 | 3.22  |
| 1  | 1450930_at         | Hpca      | 0.040907 | 0.148765 | 2.76  |

**Supplemental Table 3 – Histomorphometric analysis of *Rhoc*<sup>-/-</sup> mice.**

Histomorphometric analysis of the tibia of 8 week of *Rhoc*<sup>+/+</sup> or *Rhoc*<sup>-/-</sup> female mice. p-value determined by 2-tailed student's t-test.

|                 | <i>Rhoc</i> <sup>+/+</sup> (n=5) |         | <i>Rhoc</i> <sup>-/-</sup> (n=5) |        | p-value |
|-----------------|----------------------------------|---------|----------------------------------|--------|---------|
|                 | Avg.                             | St.Dev. | Avg.                             | St.Dev |         |
| <b>BV/TV</b>    | <b>20.5</b>                      | 3.9     | <b>17.2</b>                      | 2.3    | 0.157   |
| <b>TbTh</b>     | <b>29.2</b>                      | 1.1     | <b>31.6</b>                      | 4.4    | 0.355   |
| <b>TbN</b>      | <b>7.0</b>                       | 1.3     | <b>5.5</b>                       | 0.6    | 0.057   |
| <b>TbSp</b>     | <b>117.5</b>                     | 28.5    | <b>153.2</b>                     | 16.8   | 0.054   |
| <b>BS/BV</b>    | <b>68.6</b>                      | 2.6     | <b>64.1</b>                      | 8.4    | 0.369   |
| <b>OTh</b>      | <b>2.7</b>                       | 0.3     | <b>2.8</b>                       | 0.2    | 0.748   |
| <b>OV/TV</b>    | <b>1.7</b>                       | 0.4     | <b>1.4</b>                       | 0.2    | 0.188   |
| <b>OV/BV</b>    | <b>8.4</b>                       | 2.3     | <b>8.2</b>                       | 2.0    | 0.901   |
| <b>OS/BS</b>    | <b>41.9</b>                      | 7.1     | <b>43.5</b>                      | 5.5    | 0.715   |
| <b>NOb/TAR</b>  | <b>339.7</b>                     | 45.2    | <b>296.0</b>                     | 51.5   | 0.230   |
| <b>NOb/BPm</b>  | <b>31.8</b>                      | 7.2     | <b>35.1</b>                      | 8.4    | 0.545   |
| <b>NOb/Opm</b>  | <b>75.1</b>                      | 6.3     | <b>79.8</b>                      | 10.0   | 0.454   |
| <b>Nob/Obpm</b> | <b>111.0</b>                     | 6.9     | <b>110.5</b>                     | 3.2    | 0.893   |
| <b>ObS/BS</b>   | <b>28.5</b>                      | 6.0     | <b>31.8</b>                      | 7.3    | 0.503   |
| <b>ObS/OS</b>   | <b>67.7</b>                      | 3.2     | <b>72.2</b>                      | 8.6    | 0.379   |
| <b>NOc/TAR</b>  | <b>26.9</b>                      | 4.6     | <b>24.4</b>                      | 3.6    | 0.386   |
| <b>NOc/BPm</b>  | <b>2.5</b>                       | 0.6     | <b>2.9</b>                       | 0.6    | 0.413   |
| <b>OcS/BS</b>   | <b>7.6</b>                       | 1.8     | <b>8.9</b>                       | 2.5    | 0.418   |

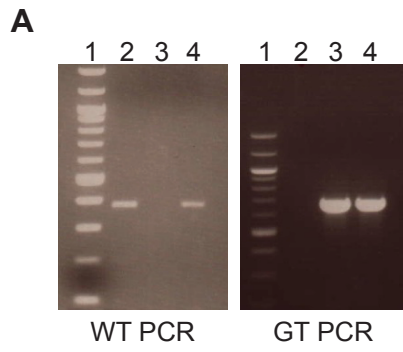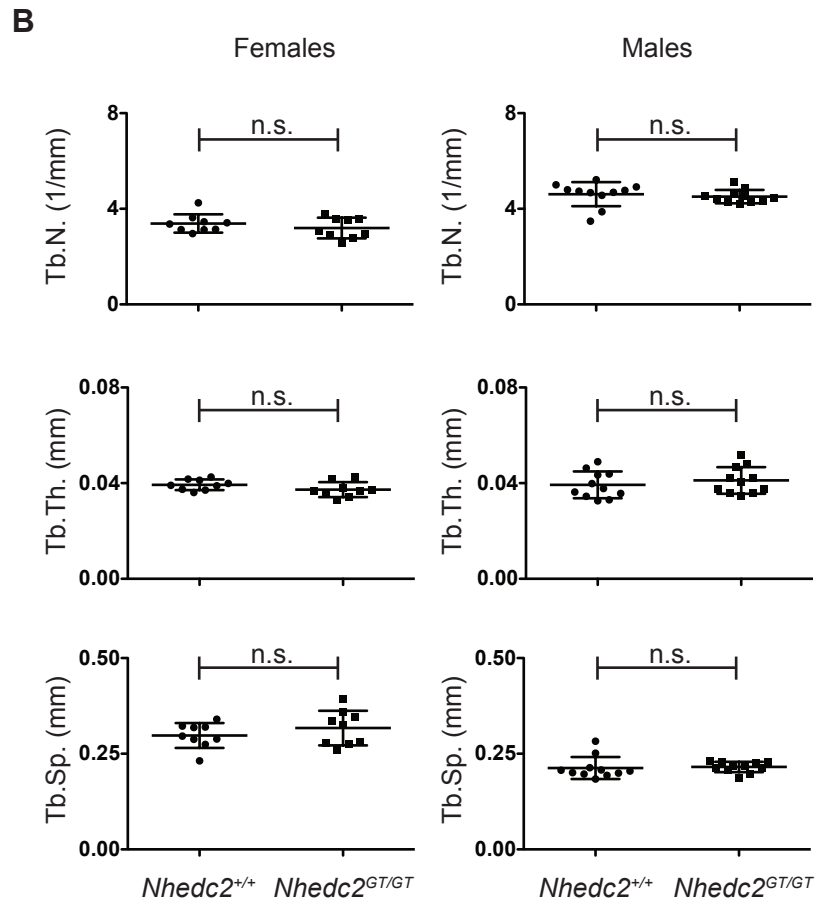

**Supplemental Figure 1**

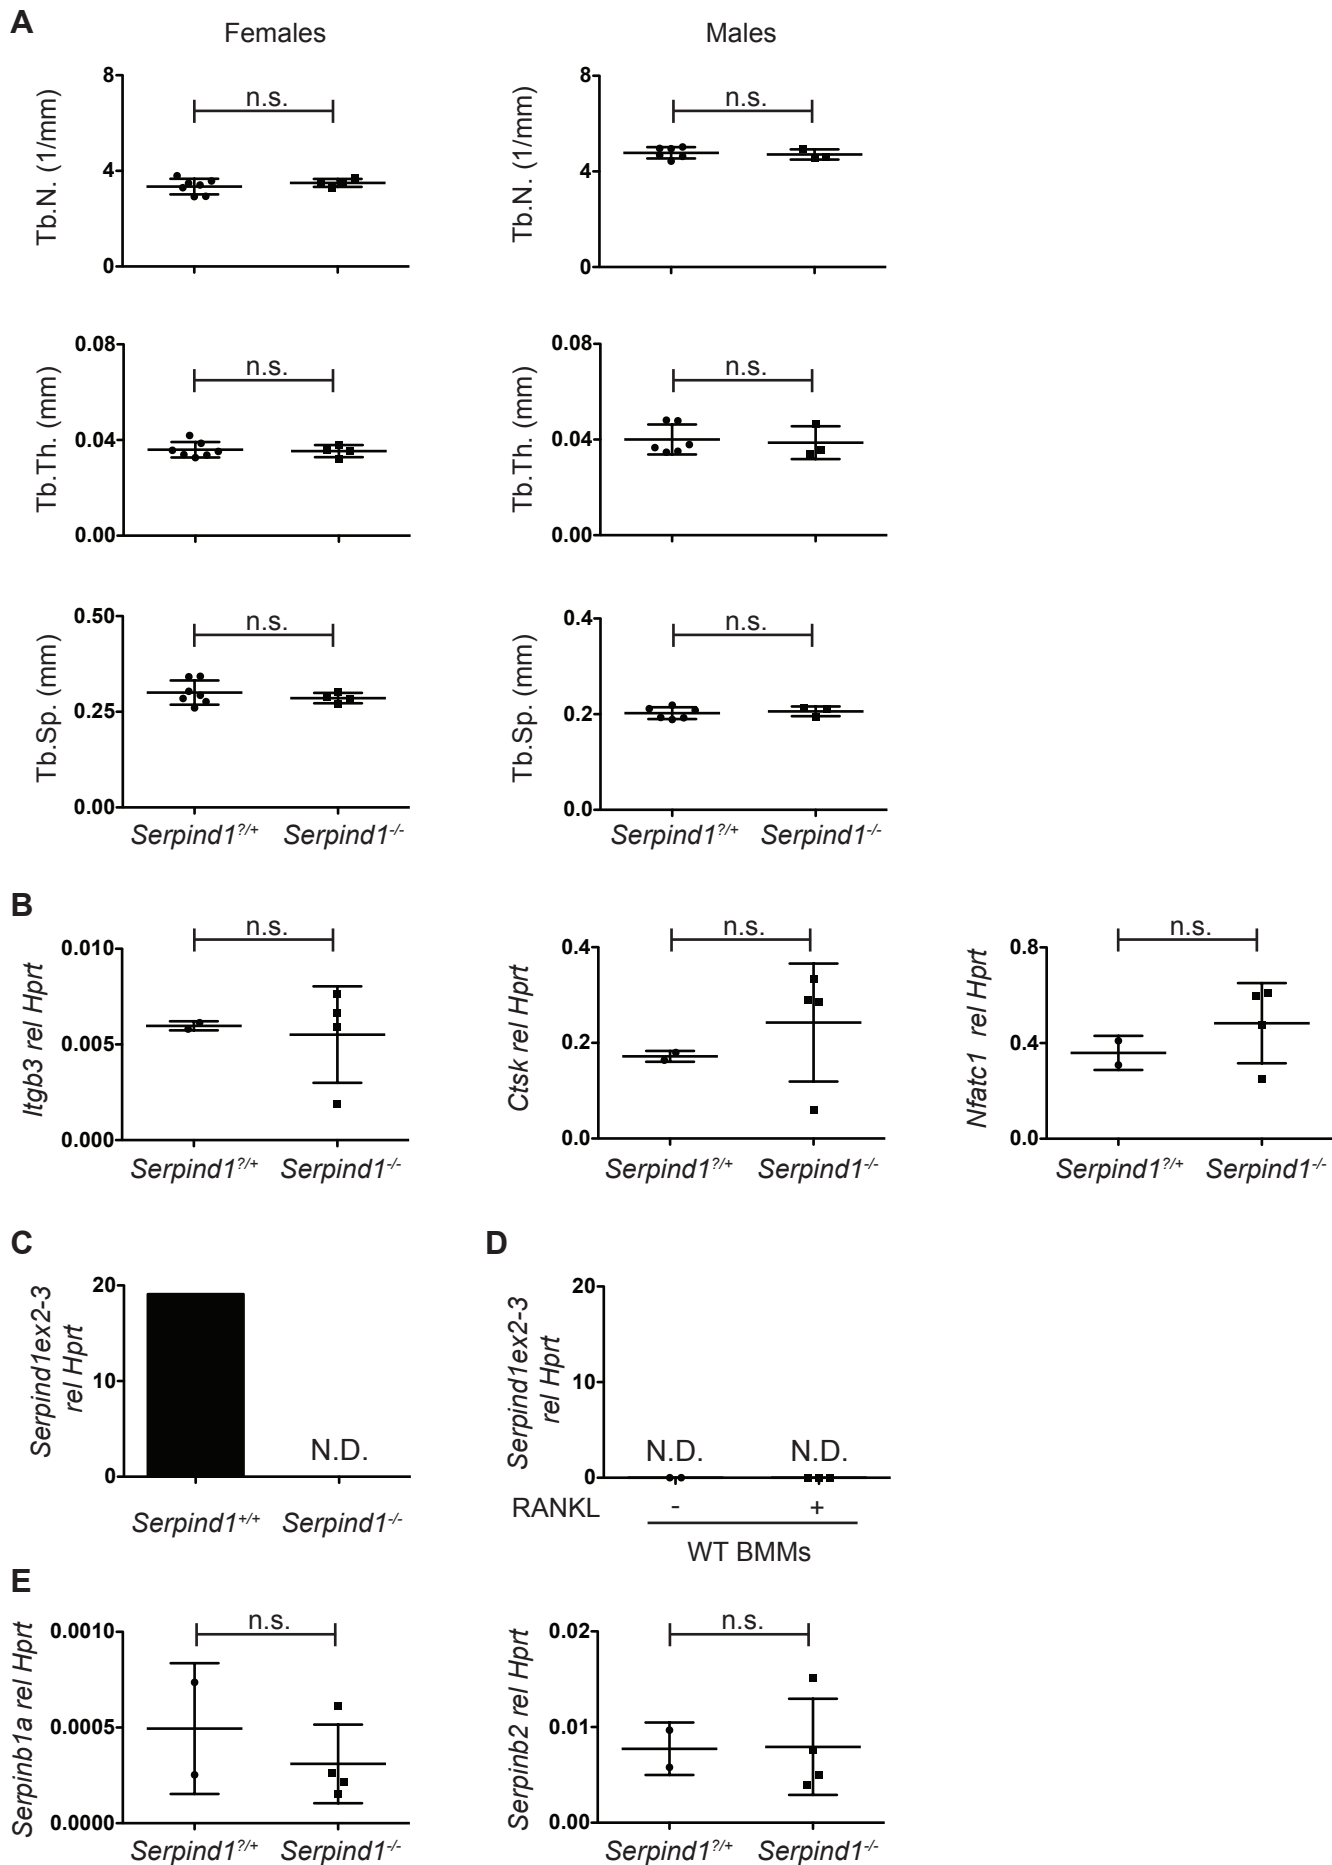

**Supplemental Figure 2**

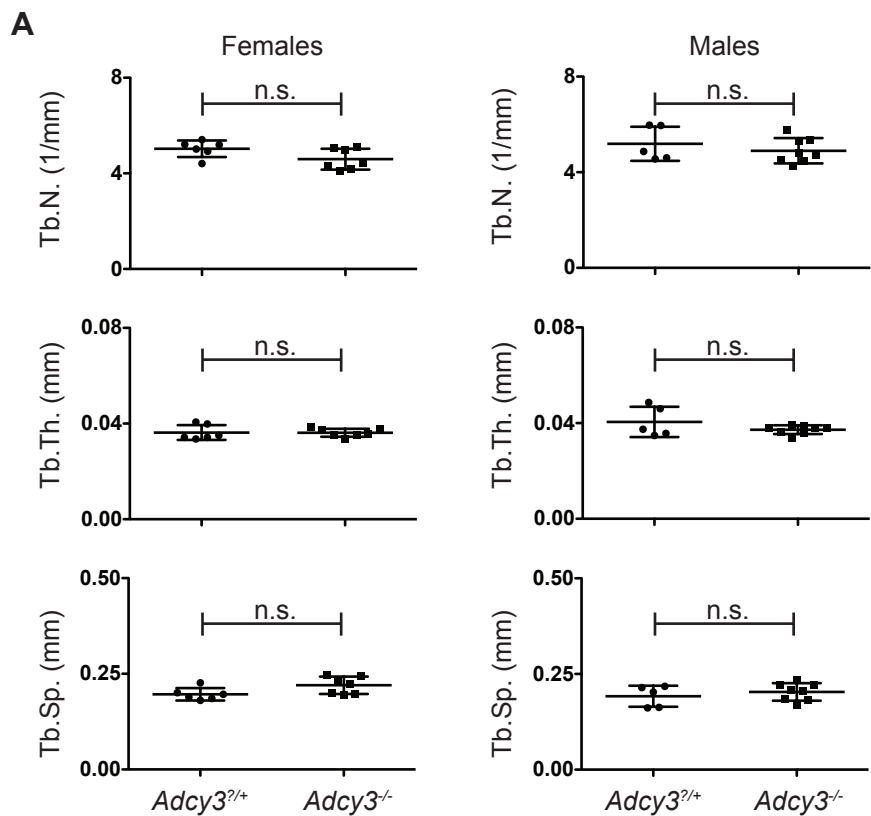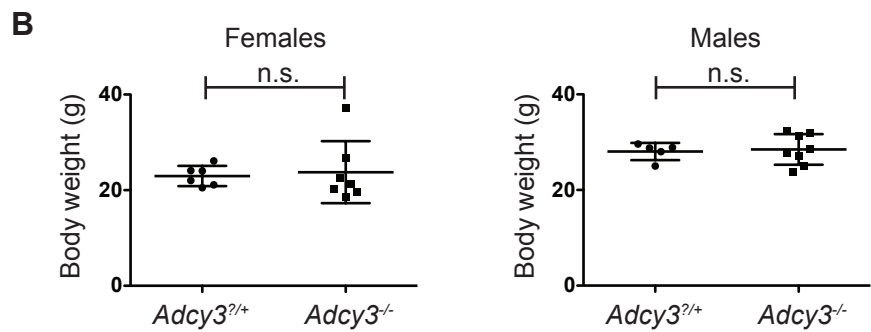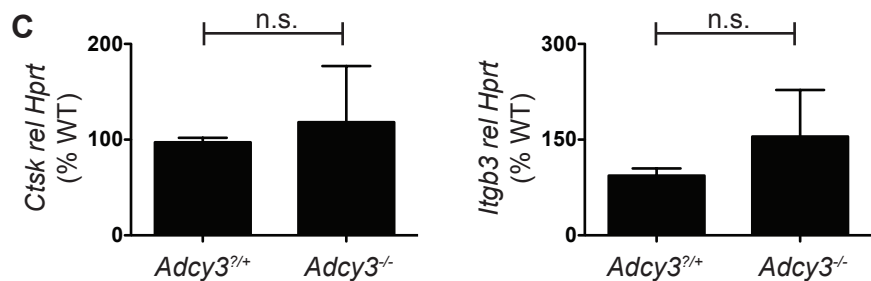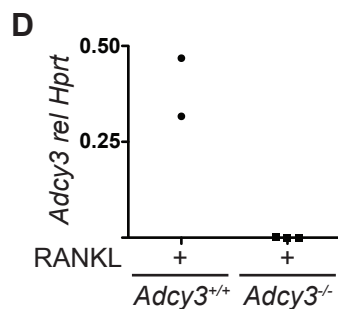

**Supplemental Figure 3**

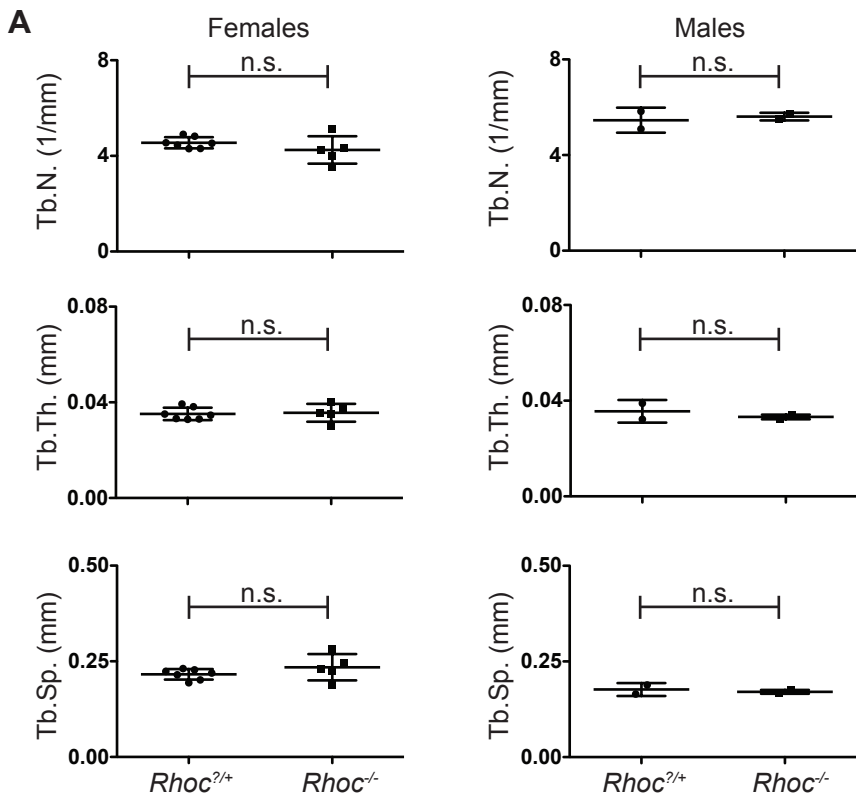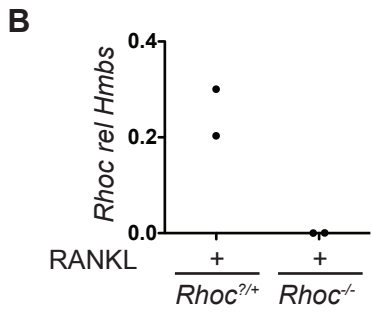

Supplemental Figure 4

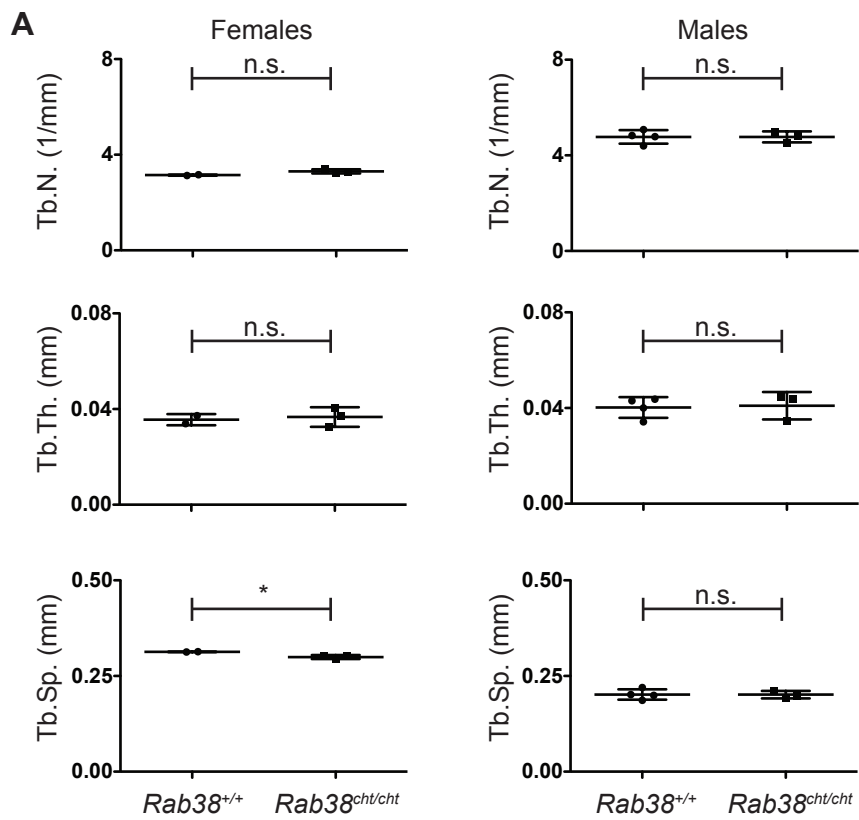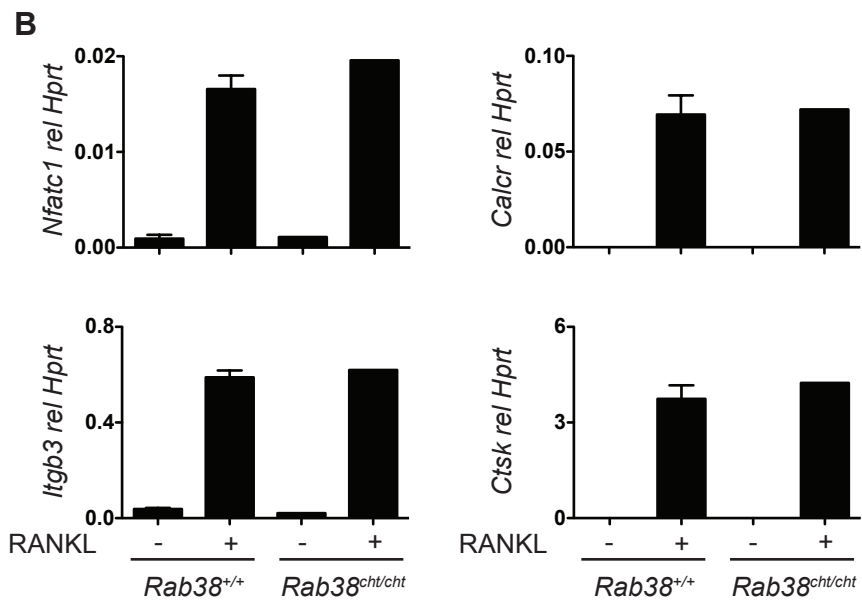

Supplemental Figure 5
